# Supplementary material for: NOTCH1 gene amplification promotes expansion of Cancer Associated Fibroblast populations in human skin
Source: PubMed Central journal article supplement (PMC7550609; doi:10.1038/s41467-020-18919-2), 2020-10-12
Supplement: 41467_2020_18919_MOESM5_ESM.pdf [file 41467_2020_18919_MOESM5_ESM.pdf]

## Supplementary Data 2. List of cell strains and identifiers.

| <b>Data S2.</b>                             |         |                |
|---------------------------------------------|---------|----------------|
| <b>List of cell strains and identifiers</b> |         |                |
| Cell type                                   | Species | Name           |
| Primary dermal fibroblasts                  | Human   | f-HDF1         |
| Primary dermal fibroblasts                  | Human   | f-HDF2         |
| Primary dermal fibroblasts                  | Human   | f-HDF3         |
| Primary dermal fibroblasts                  | Human   | f-HDF4         |
| Primary dermal fibroblasts                  | Human   | f-HDF5         |
| Primary dermal fibroblasts                  | Human   | f-HDF6         |
| Cancer associated fibroblasts               | Human   | CAF8           |
| Cancer associated fibroblasts               | Human   | CAF9           |
| Cancer associated fibroblasts               | Human   | CAF10          |
| Cancer associated fibroblasts               | Human   | CAF11          |
| Cancer associated fibroblasts               | Human   | CAF12          |
| Cancer associated fibroblasts               | Human   | CAF13          |
| Cancer associated fibroblasts               | Human   | CAF14          |
| Cancer associated fibroblasts               | Human   | CAF15          |
| Cancer associated fibroblasts               | Human   | CAF16          |
| Matched dermal fibroblasts                  | Human   | m-HDF8         |
| Matched dermal fibroblasts                  | Human   | m-HDF9         |
| Matched dermal fibroblasts                  | Human   | m-HDF10        |
| Matched dermal fibroblasts                  | Human   | m-HDF11        |
| Matched dermal fibroblasts                  | Human   | m-HDF12        |
| Matched dermal fibroblasts                  | Human   | m-HDF13        |
| Matched dermal fibroblasts                  | Human   | m-HDF14        |
| Matched dermal fibroblasts                  | Human   | m-HDF15        |
| Matched dermal fibroblasts                  | Human   | m-HDF16        |
| SCC13                                       | Human   | RRID:CVCL_4029 |

**Supplementary Data 3. Sequence of the oligonucleotides used for qPCR experiments.**

| <b>Data S3.<br/>Sequence of the oligonucleotides used for qPCR experiments</b> |        |                           |
|--------------------------------------------------------------------------------|--------|---------------------------|
| Gene                                                                           | Primer | Sequence                  |
| <i>NOTCH1 set 1</i>                                                            | F      | AGCCTGCACAACCAGACAGA      |
|                                                                                | R      | GCCACTGCCTACCTGGAAGA      |
| <i>NOTCH1 set 2</i>                                                            | F      | CAGGGTAACCAGGGCCTTC       |
|                                                                                | R      | CCCTCGACAAAGCAACAGGT      |
| <i>NOTCH1 set 3</i>                                                            | F      | CCAACTGCGAGATCAACCTG      |
|                                                                                | R      | TGGCTGACCTTGACCTCTGA      |
| <i>ERCC2</i>                                                                   | F      | GATGCCAGCCCCTCTGAGT       |
|                                                                                | R      | CACCTGAGCACCGTCTTCTG      |
| <i>UVSSA</i>                                                                   | F      | CCTGCTTTAACACGCTTACCC     |
|                                                                                | R      | CAGTGACGGAGGCAAGACTG      |
| <i>RPLP0</i>                                                                   | F      | GAAATGTTTCATTGTGGGAGCA    |
|                                                                                | R      | CCAGAGCTGGGTTGTTTTCC      |
| <i>GAPDH</i>                                                                   | F      | CTGCCACCCAGAAGACTGTG      |
|                                                                                | R      | GGTCAGGTCCACCACTGACA      |
| <i>TP53</i>                                                                    | F      | CTTTCAGACTTCCTGAAAACAACGT |
|                                                                                | R      | GGGTGTGATGGGATGGATAAAAAGC |
| <i>TUBA1A</i>                                                                  | F      | GAGTGCATCTCCATCCACGTT     |
|                                                                                | R      | AGCCCCCGTCTCACTGAAG       |

### Supplementary Data 4. List of antibodies used.

| <b>Data S4.</b>                 |         |                                                |                                      |                  |
|---------------------------------|---------|------------------------------------------------|--------------------------------------|------------------|
| <b>List of antibodies used</b>  |         |                                                |                                      |                  |
| Target                          | Species | Company and catalog #                          | Assay and dilution used              | RRID             |
| γ-H2AX                          | Rabbit  | Cell Signaling #2577                           | IF (1:100), WB (1:1000)              | RRID:AB_2118010  |
| γ-Tubulin                       | Mouse   | Sigma #GTU-88                                  | WB (1:2000)                          | RRID:AB_477584   |
| Vimentin                        | Rat     | R&D # MAB2105 / Pan / Human/Mouse/Rat Vimentin | IF (1:200)                           | RRID:AB_2241653  |
| Vimentin                        | Goat    | Sigma # V4630-Human Specific                   | IF (1:20)                            | RRID:AB_477619   |
| Cytokeratin                     | Mouse   | BMA Biomedicals AG #T-1302                     | IF (1:200)                           | RRID:AB_1227343  |
| P53                             | Mouse   | Santa Cruz #126                                | WB (1:1000)                          | RRID:AB_628082   |
| ATM                             | Mouse   | Sigma #A1106                                   | PLA (1:100), WB (1:1000)             | RRID:AB_796190   |
| FOXO3A                          | Rabbit  | Cell Signaling #2497                           | PLA (1:100)                          | RRID:AB_836876   |
| IgG                             | Mouse   | Cell Signaling #5415                           | PLA (1:100)                          | RRID:AB_10829607 |
| IgG                             | Rabbit  | Cell signaling #2729                           | PLA (1:100)                          | RRID:AB_2617119  |
| NOTCH1                          | Rabbit  | Santa Cruz #6014                               | WB (1:1000), IF (1:100), PLA (1:100) | RRID:AB_650336   |
| Anti-activated NOTCH1           | Rabbit  | Abcam #8925 (ICN1)                             | WB (1:1000), IF (1:100)              | RRID:AB_306863   |
| Cleaved Notch1 (Val1744) (D3B8) | Rabbit  | Cell signaling #4147 (ICN1)                    | WB (1:1000), IF (1:100)              | RRID:AB_2153348  |
| PDGFRα                          | Goat    | R&D #AF307NA                                   | IF (1:100)                           | RRID:AB_354459   |
| p-ATM                           | Rabbit  | Cell signaling #13050                          | IF (1:50), WB (1:1000)               | RRID:AB_2798100  |
| p-CHK2                          | Rabbit  | Cell signaling #2661                           | IF (1:50)                            | RRID:AB_331479   |
| p-CHK2                          | Rabbit  | Cell signaling #2197                           | WB (1:1000)                          | RRID:AB_2080501  |
| pS/TQ                           | Rabbit  | Cell signaling #2851                           | IF (1:50)                            | RRID:AB_330318   |
| pS15-p53                        | Rabbit  | Cell signaling #9284                           | IF (1:50), WB (1:1000)               | RRID:AB_331464   |
| Cytokeratin                     | Mouse   | ENZO #ENZ-C34903                               | IF (1:200)                           | RRID:AB_2133885  |
| POSTN                           | Rabbit  | Abcam #92460                                   | IF (1:100)                           | RRID:AB_2166645  |
| CD68                            | Rat     | Abcam #53444                                   | IF (1:100)                           | RRID:AB_869007   |
| CD31                            | Rat     | BD/Pharmingen #550274                          | IF (1:100)                           | RRID:AB_393571   |
| SMA                             | Mouse   | Sigma #1A4                                     | WB (1:2000)                          | RRID:AB_476701   |
| CHK2                            | Rabbit  | Cell signaling #6334                           | WB (1:1000)                          | RRID:AB_11178526 |
| Ki67                            | Rabbit  | GeneTex #GTX16667                              | IF (1:100)                           | RRID:AB_422351   |
| CSL                             | Rabbit  | Cell signaling #5313                           | WB (1:1000)                          | RRID:AB_2665555  |
| ATM                             | Rabbit  | Proteintech#27156-1-AP                         | IP (10 μg)                           |                  |
| Anti-Human IgG                  | Rabbit  | Sigma # I2011                                  |                                      |                  |
| Anti-rabbit Alexa fluor 568     |         | Invitrogen # A10042                            | IF (1:1000)                          |                  |
| Anti-rat Alexa fluor 488        |         | Invitrogen # A-11006                           | IF (1:1000)                          |                  |
| Anti-mouse Alexa fluor 568      |         | Invitrogen # A32723                            | IF (1:1000)                          |                  |
| Anti-goat Alexa fluor 488       |         | Invitrogen # A32814                            | IF (1:1000)                          |                  |
| VeriBlot for IP Detection HRP   |         | Abcam #131366                                  | WB (1:200)                           |                  |

**Supplementary Data 5. Sequence of the oligonucleotides used for qRT-PCR experiments.**

| <b>Data S5.</b>                                                      |        |                            |
|----------------------------------------------------------------------|--------|----------------------------|
| <b>Sequence of the oligonucleotides used for qRT-PCR experiments</b> |        |                            |
| Gene                                                                 | Primer | Sequence                   |
| <i>RPLP0</i>                                                         | F      | GCAATGTTGCCAGTGTCTGT       |
|                                                                      | R      | GCCTTGACCTTTTCAGCAAG       |
| <i>P53</i>                                                           | F      | AGGCCTTGGAAGCTCAAGGAT      |
|                                                                      | R      | CTGAGTCAGGCCCTTCTGTC       |
| <i>P21</i>                                                           | F      | CCCAAGCTCTACCTTCCCAC       |
|                                                                      | R      | ACAGGTCCACATGGTCTTCC       |
| <i>IL6</i>                                                           | F      | GTGTGAAAGCAGCAAAGAGGCACTG  |
|                                                                      | R      | TGCCTTTTTTCTGCAGGAACTGGATC |
| <i>ACTA2</i>                                                         | F      | AGCGCAAATACTCTGTCTGG       |
|                                                                      | R      | AGGCATAATTCCACAGGACA       |
| <i>POSTN</i>                                                         | F      | CAAAACTGAAGGACCCACAC       |
|                                                                      | R      | TATTTCCACAGGCACTCCAT       |
| <i>TNC</i>                                                           | F      | TAACAGCATCACCTGGAAT        |
|                                                                      | R      | TCCTTGTCTTCCTTCACAGC       |
| <i>CSL</i>                                                           | F      | CAAAAGTTGCACAGAAGTCATA     |
|                                                                      | R      | TGCTGCATTTCTTGGTCAC        |
| <i>NOTCH1</i>                                                        | F      | CTGAAGAACGGGGCTAACA        |
|                                                                      | R      | CAGGTTGTAAGTCCAGCA         |
| <i>HES1</i>                                                          | F      | GGTGCTGATAACAGCGGAAT       |
|                                                                      | R      | TGAGCAAGTGCTGAGGGTTT       |
| <i>JAGGED1</i>                                                       | F      | GGGAAAACGTGCCAGTTAGA       |
|                                                                      | R      | ACAATTCTGACCCATCCAGC       |
| <i>JAGGED2</i>                                                       | F      | CAATGGTGGCATCTGTGTTG       |
|                                                                      | R      | GCGATACCCGTTGATCTCAT       |

**Supplementary Data 6. Identifiers for the Silencer™ oligonucleotides (Ambion and Thermofisher) used for RNA-interference experiments.**

| <b>Data S6.<br/>Identifiers for the Silencer™ oligonucleotides (Ambion and Thermofisher) used for RNA-interference experiments</b> |          |     |      |
|------------------------------------------------------------------------------------------------------------------------------------|----------|-----|------|
| Gene name                                                                                                                          | #Catalog | #ID |      |
| Control                                                                                                                            | 4390846  |     | NA   |
| <i>NOTCH1</i> siRNA #1                                                                                                             | 4392420  |     | 9633 |
| <i>NOTCH1</i> siRNA #1                                                                                                             | 4392420  |     | 9634 |
| <i>CSL</i> siRNA #1                                                                                                                | 4392420  |     | 7252 |
| <i>CSL</i> siRNA #2                                                                                                                | 4392420  |     | 7253 |
